# Supplementary material for: Cordyceps militaris improves the survival of Dahl salt-sensitive hypertensive rats possibly via influences of mitochondria and autophagy functions
Source: PubMed Central journal article supplement (PMC5727564; doi:10.1016/j.heliyon.2017.e00462), 2017-11-24
Supplement: mmc2.pdf [file mmc2.pdf]

# Spinal cord

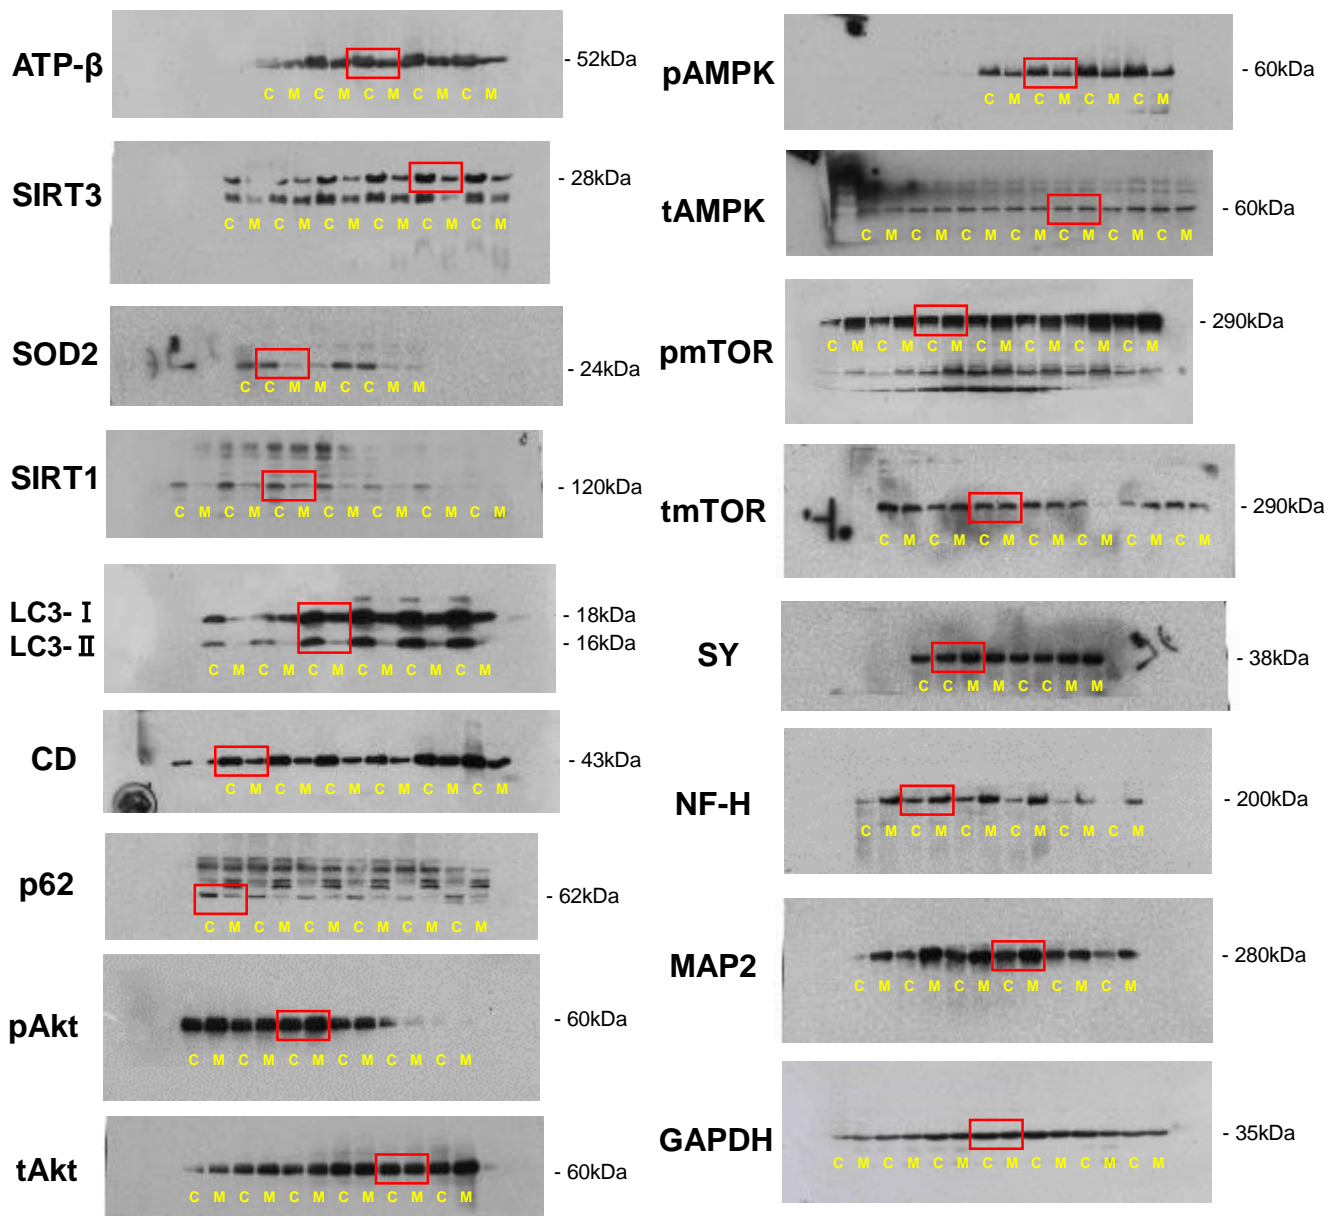

Fig. S8.2
