# Supplementary material for: Cordyceps militaris improves the survival of Dahl salt-sensitive hypertensive rats possibly via influences of mitochondria and autophagy functions
Source: PubMed Central journal article supplement (PMC5727564; doi:10.1016/j.heliyon.2017.e00462), 2017-11-24
Supplement: mmc3.pdf [file mmc3.pdf]

# Heart

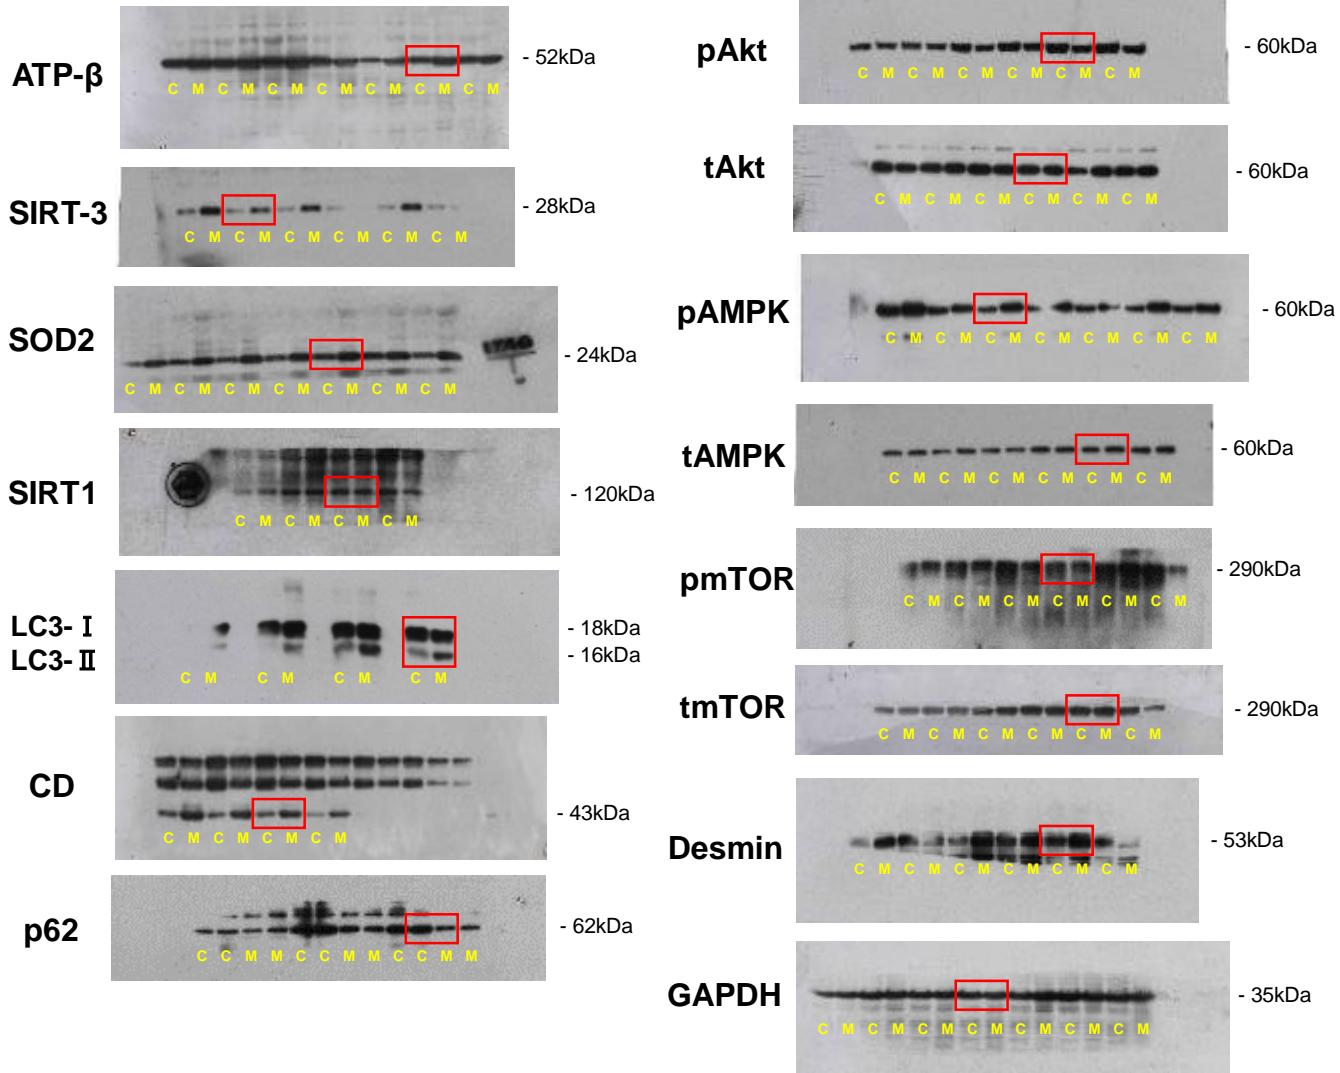

Fig. S9.1
